# Supplementary material for: Time Course and Determinants of Individual Motivation among Women Enrolled in a Diet and Physical Activity Primary Prevention Trial
Source: MDPI journal article supplement (doi:10.3390/ijerph17228589), 2020-11-19

1 **Table S1.** Median and mean score in the end-of-study motivation questionnaire by categories of score  
2 in the baseline motivation questionnaire. The Diet, Physical Activity and Mammography trial.  
3 Florence, Italy, 2009-2012.

| Importance to change eating habits            |              |      | Confidence to be able to change eating habits            |              |      |
|-----------------------------------------------|--------------|------|----------------------------------------------------------|--------------|------|
| baseline                                      | end-of-study |      | baseline                                                 | end-of-study |      |
|                                               | median       | mean |                                                          | median       | mean |
| <=5                                           | 8            | 8.1  | <=5                                                      | 7            | 6.7  |
| 6                                             | 9            | 8.8  | 6                                                        | 7            | 6.9  |
| 7                                             | 9            | 8.3  | 7                                                        | 8            | 7.3  |
| 8                                             | 9            | 8.6  | 8                                                        | 8            | 7.6  |
| 9                                             | 10           | 9.2  | 9                                                        | 8            | 8.0  |
| 10                                            | 10           | 9.3  | 10                                                       | 9            | 8.6  |
| Importance to change physical activity levels |              |      | Confidence to be able to change physical activity levels |              |      |
| baseline                                      | end-of-study |      | baseline                                                 | end-of-study |      |
|                                               | median       | mean |                                                          | median       | mean |
| <=5                                           | 9            | 8.4  | <=5                                                      | 8            | 7.7  |
| 6                                             | 8            | 7.7  | 6                                                        | 7            | 6.6  |
| 7                                             | 9.5          | 9.1  | 7                                                        | 8            | 7.3  |
| 8                                             | 10           | 8.9  | 8                                                        | 8            | 7.6  |
| 9                                             | 9            | 8.9  | 9                                                        | 8            | 7.8  |
| 10                                            | 10           | 9.3  | 10                                                       | 9            | 8.4  |
| Willingness to participate                    |              |      |                                                          |              |      |
| baseline                                      | end-of-study |      |                                                          |              |      |
|                                               | median       | mean |                                                          |              |      |
| <=5                                           | 8.5          | 7.9  |                                                          |              |      |
| 6                                             | 8            | 7.9  |                                                          |              |      |
| 7                                             | 9            | 8.5  |                                                          |              |      |
| 8                                             | 9            | 8.4  |                                                          |              |      |
| 9                                             | 10           | 9.2  |                                                          |              |      |
| 10                                            | 10           | 8.9  |                                                          |              |      |

6 **Figure S1.** Mean score to the question about importance to change eating habits at the baseline, midway and end-of-study motivation questionnaire, by  
7 study arm (D: diet; PA: physical activity; D+PA: diet and physical activity; C: control). The Diet, Physical Activity and Mammography trial, Florence,  
8 Italy, 2009-2012.

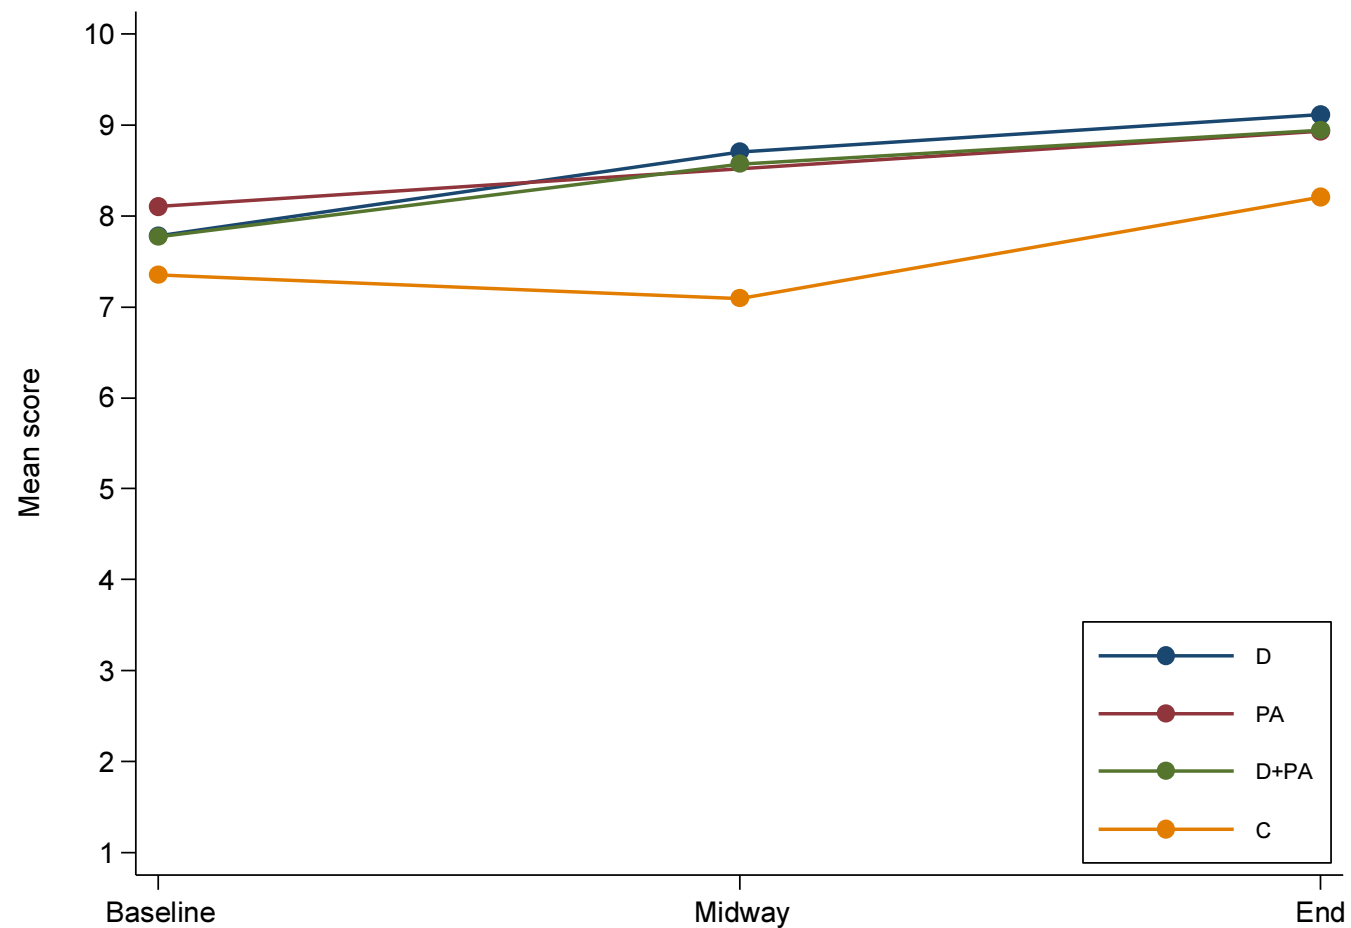

10 **Figure S2.** Mean score to the question about importance to change physical activity levels at the baseline, midway and end-of-study motivation  
11 questionnaire, by study arm (D: diet; PA: physical activity; D+PA: diet and physical activity; C: control). The Diet, Physical Activity and  
12 Mammography trial, Florence, Italy, 2009-2012.

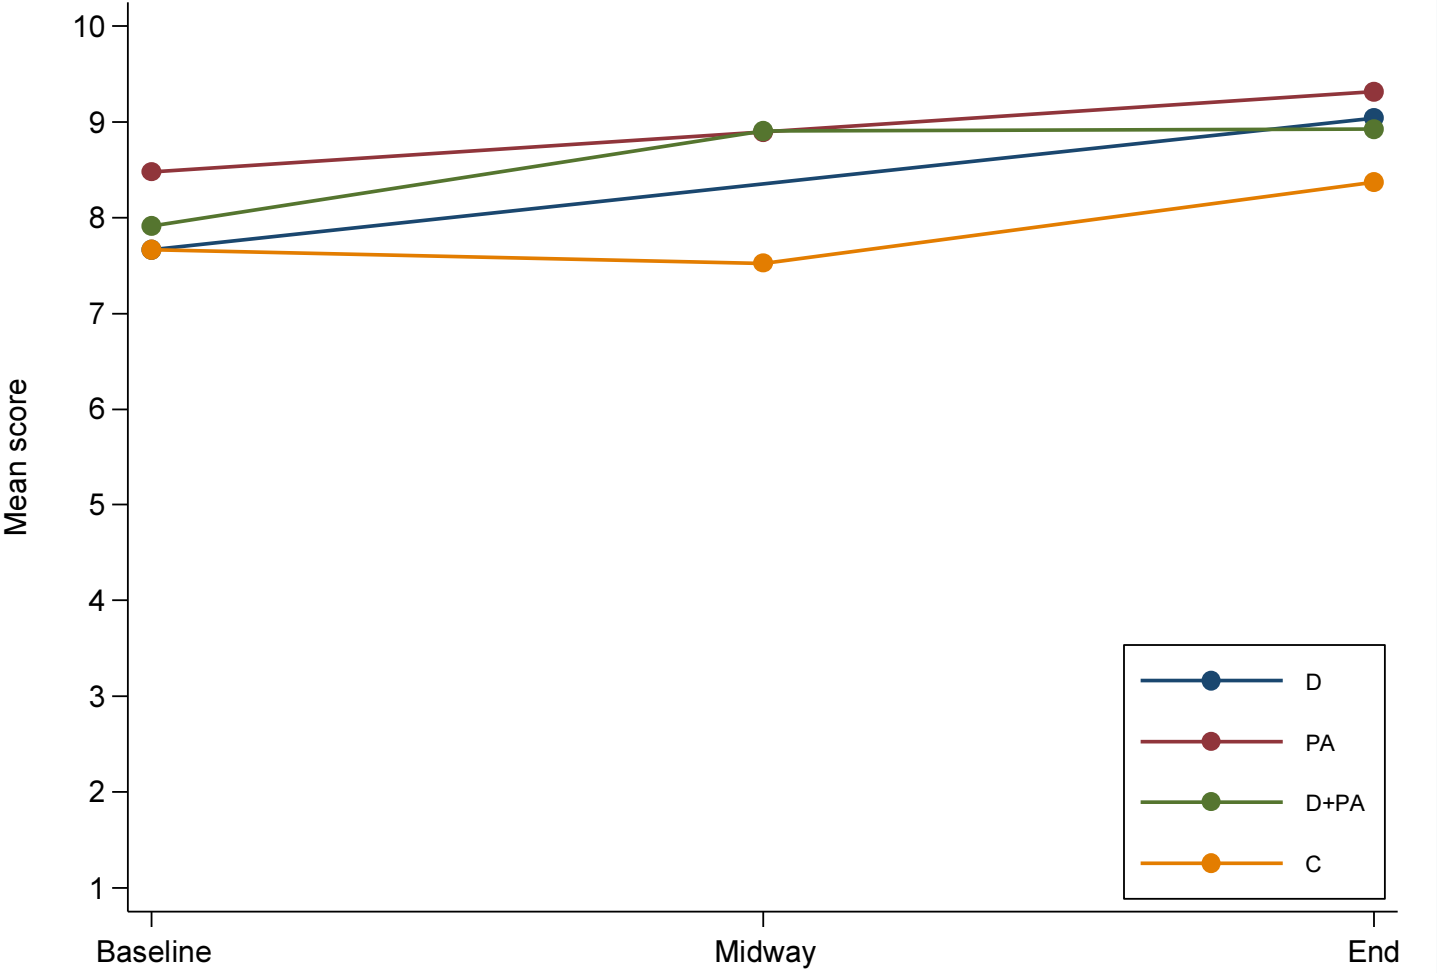

13

14 **Figure S3.** Mean score to the question about confidence to be able to change eating habits at the baseline, midway and end-of-study motivation  
15 questionnaire, by study arm (D: diet; PA: physical activity; D+PA: diet and physical activity; C: control). The Diet, Physical Activity and  
16 Mammography trial, Florence, Italy, 2009-2012.

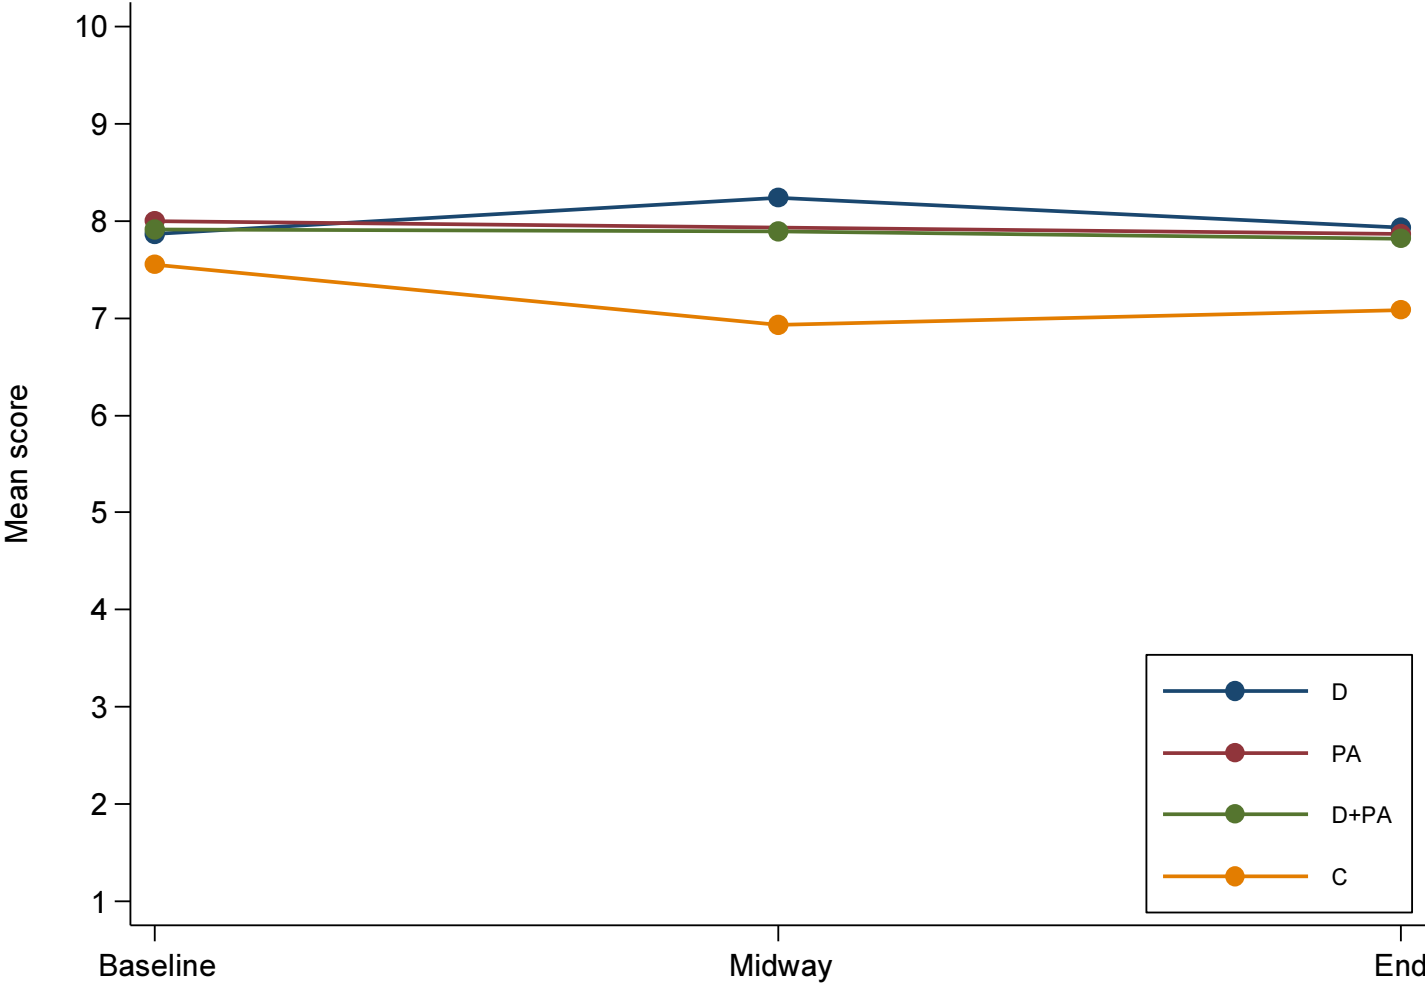

18 **Figure S4.** Mean score to the question about confidence to be able to change physical activity levels at the baseline, midway and end-of-study  
19 motivation questionnaire, by study arm (D: diet; PA: physical activity; D+PA: diet and physical activity; C: control). The Diet, Physical Activity and  
20 Mammography trial, Florence, Italy, 2009-2012.

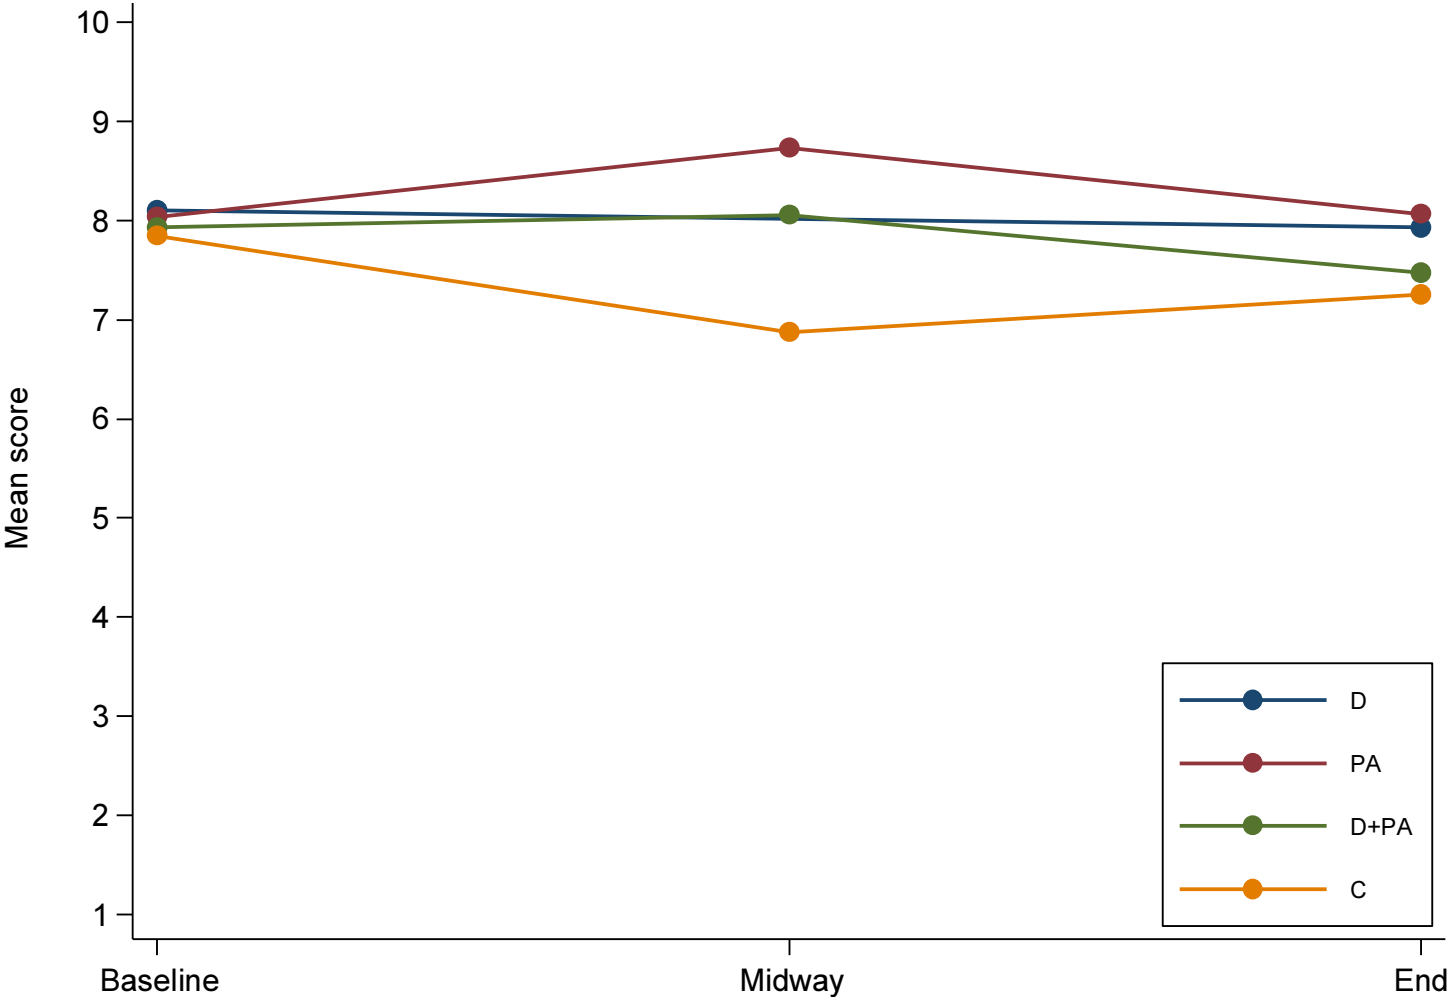

22 **Figure S5.** Mean score to the question about willingness to participate in this type of research activities at the baseline, midway and end-of-study  
23 motivation questionnaire, by study arm (D: diet; PA: physical activity; D+PA: diet and physical activity; C: control). The Diet, Physical Activity and  
24 Mammography trial, Florence, Italy, 2009-2012.

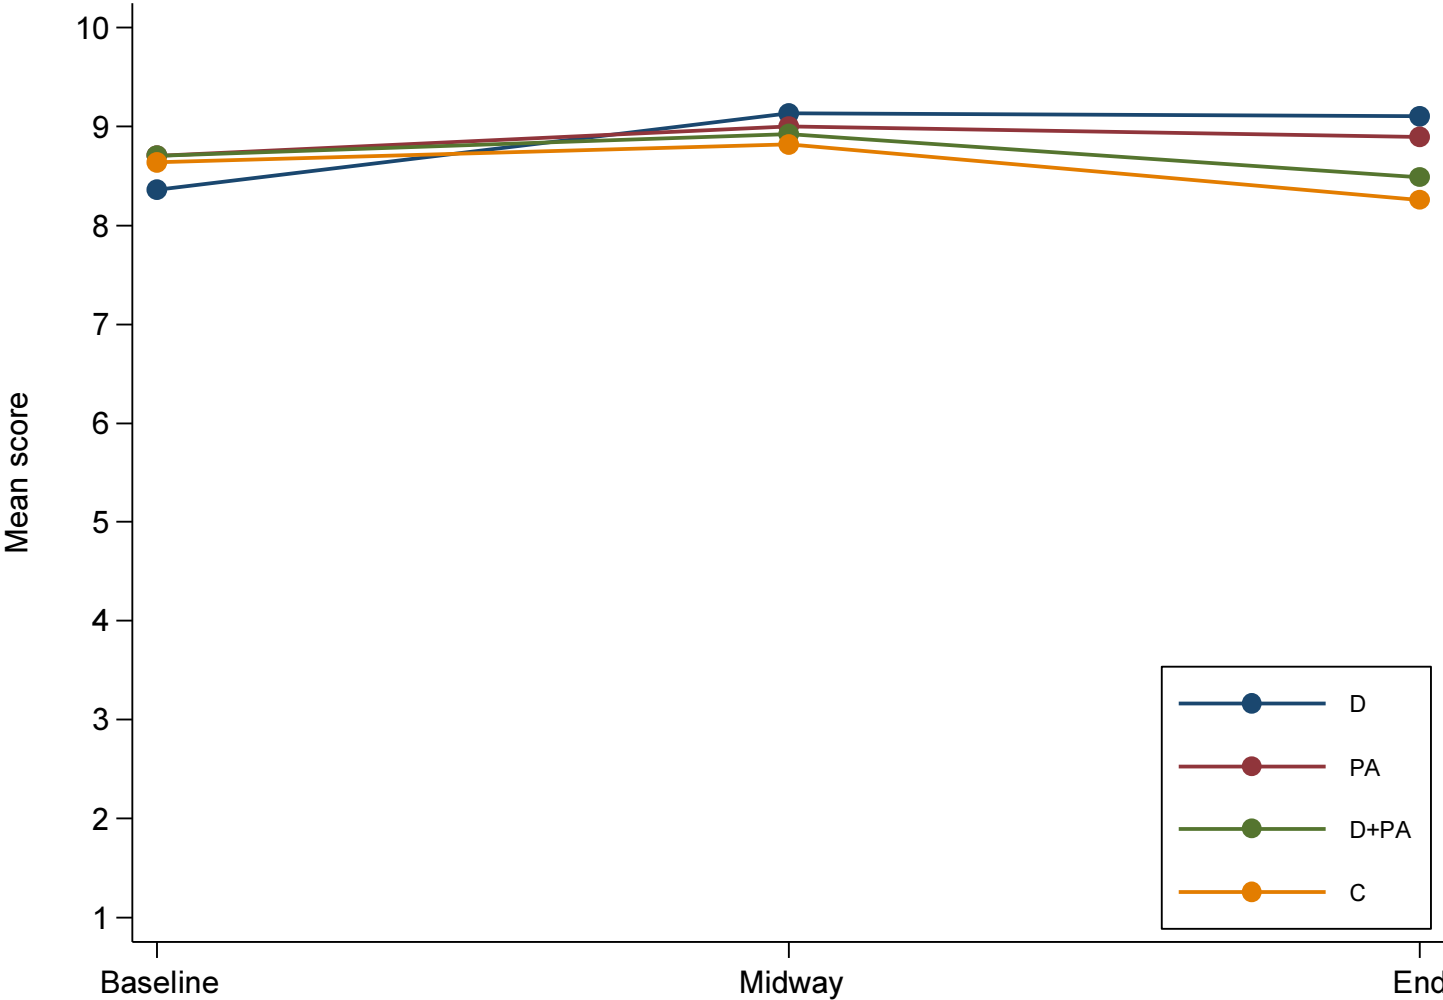

Supplement: s1 [file s1]
